# Supplementary material for: Effect of traditional Asian exercise on patients with chronic heart failure: a protocol for network meta-analysis of randomised controlled trials
Source: PubMed Central journal article supplement — BMJ Open. 2021 Aug 27;11(8):e048891. doi: 10.1136/bmjopen-2021-048891 (PMC8404441; doi:10.1136/bmjopen-2021-048891), 2021-08-27
Supplement: bmjopen-2021-048891.draft_revisions.pdf [file bmjopen-2021-048891.draft_revisions.pdf]

# BMJ Open

BMJ Open is committed to open peer review. As part of this commitment we make the peer review history of every article we publish publicly available.

When an article is published we post the peer reviewers' comments and the authors' responses online. We also post the versions of the paper that were used during peer review. These are the versions that the peer review comments apply to.

The versions of the paper that follow are the versions that were submitted during the peer review process. They are not the versions of record or the final published versions. They should not be cited or distributed as the published version of this manuscript.

BMJ Open is an open access journal and the full, final, typeset and author-corrected version of record of the manuscript is available on our site with no access controls, subscription charges or pay-per-view fees (<http://bmjopen.bmj.com>).

If you have any questions on BMJ Open's open peer review process please email [info.bmjopen@bmj.com](mailto:info.bmjopen@bmj.com)

# BMJ Open

## Effect of traditional Asian exercise on patients with chronic heart failure: a protocol for network meta-analysis of randomised controlled trials

|                               |                                                                                                                                                                                                                                                                                                                                                                                                                                                                                                                                                                                                                                                                                                                                                                                                                                                                                                                                    |
|-------------------------------|------------------------------------------------------------------------------------------------------------------------------------------------------------------------------------------------------------------------------------------------------------------------------------------------------------------------------------------------------------------------------------------------------------------------------------------------------------------------------------------------------------------------------------------------------------------------------------------------------------------------------------------------------------------------------------------------------------------------------------------------------------------------------------------------------------------------------------------------------------------------------------------------------------------------------------|
| Journal:                      | <i>BMJ Open</i>                                                                                                                                                                                                                                                                                                                                                                                                                                                                                                                                                                                                                                                                                                                                                                                                                                                                                                                    |
| Manuscript ID                 | bmjopen-2021-048891                                                                                                                                                                                                                                                                                                                                                                                                                                                                                                                                                                                                                                                                                                                                                                                                                                                                                                                |
| Article Type:                 | Protocol                                                                                                                                                                                                                                                                                                                                                                                                                                                                                                                                                                                                                                                                                                                                                                                                                                                                                                                           |
| Date Submitted by the Author: | 10-Feb-2021                                                                                                                                                                                                                                                                                                                                                                                                                                                                                                                                                                                                                                                                                                                                                                                                                                                                                                                        |
| Complete List of Authors:     | Xu, Jianglin; Beijing University of Chinese Medicine, Dongzhimen Hospital<br>Zhang, Zhuo; Beijing University of Chinese Medicine, Dongzhimen Hospital<br>Li, Yan; Beijing University of Chinese Medicine, Dongfang Hospital<br>LIU, Jing; Beijing University of Chinese Medicine, Dongfang Hospital<br>Wan, Jie; Beijing University of Chinese Medicine, Dongfang Hospital<br>Feng, RuLi; Beijing University of Chinese Medicine, Dongzhimen Hospital<br>Jin, Jialin; Beijing University of Chinese Medicine, Dongzhimen Hospital<br>Huang, Cong; China Academy of Chinese Medical Sciences, Experimental Research Centre<br>Mao, Tianshi; Beijing University of Chinese Medicine, Dongzhimen Hospital<br>Ji, Xiang; Beijing University of Chinese Medicine, Dongzhimen Hospital<br>Zhou, Kun; Beijing University of Chinese Medicine, Dongfang Hospital<br>qian, lin; Beijing University of Chinese Medicine, Dongzhimen Hospital |
| Keywords:                     | REHABILITATION MEDICINE, Heart failure < CARDIOLOGY, COMPLEMENTARY MEDICINE                                                                                                                                                                                                                                                                                                                                                                                                                                                                                                                                                                                                                                                                                                                                                                                                                                                        |
|                               |                                                                                                                                                                                                                                                                                                                                                                                                                                                                                                                                                                                                                                                                                                                                                                                                                                                                                                                                    |

SCHOLARONE™  
Manuscripts

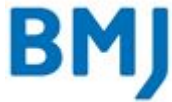

I, the Submitting Author has the right to grant and does grant on behalf of all authors of the Work (as defined in the below author licence), an exclusive licence and/or a non-exclusive licence for contributions from authors who are: i) UK Crown employees; ii) where BMJ has agreed a CC-BY licence shall apply, and/or iii) in accordance with the terms applicable for US Federal Government officers or employees acting as part of their official duties; on a worldwide, perpetual, irrevocable, royalty-free basis to BMJ Publishing Group Ltd ("BMJ") its licensees and where the relevant Journal is co-owned by BMJ to the co-owners of the Journal, to publish the Work in this journal and any other BMJ products and to exploit all rights, as set out in our [licence](#).

The Submitting Author accepts and understands that any supply made under these terms is made by BMJ to the Submitting Author unless you are acting as an employee on behalf of your employer or a postgraduate student of an affiliated institution which is paying any applicable article publishing charge ("APC") for Open Access articles. Where the Submitting Author wishes to make the Work available on an Open Access basis (and intends to pay the relevant APC), the terms of reuse of such Open Access shall be governed by a Creative Commons licence – details of these licences and which [Creative Commons](#) licence will apply to this Work are set out in our licence referred to above.

Other than as permitted in any relevant BMJ Author's Self Archiving Policies, I confirm this Work has not been accepted for publication elsewhere, is not being considered for publication elsewhere and does not duplicate material already published. I confirm all authors consent to publication of this Work and authorise the granting of this licence.

1  
2  
3  
4 **Effect of traditional Asian exercise on patients with chronic heart**  
5  
6 **failure: a protocol for network meta-analysis of randomised controlled**  
7  
8 **trials**  
9  
10

11  
12 Jianglin Xu,<sup>1</sup> Zhuo Zhang,<sup>1</sup> Yan Li,<sup>2</sup> Jing Liu,<sup>2</sup> Jie Wan,<sup>2</sup> Ruli Feng,<sup>1</sup> Jialin Jin,<sup>1</sup> Cong  
13 Huang,<sup>3</sup> Tianshi Mao,<sup>1</sup> Xiang Ji,<sup>1</sup> Kun Zhou,<sup>2\*</sup> Qian Lin<sup>1\*</sup>  
14  
15

16 <sup>1</sup> Dongzhimen Hospital, Beijing University of Chinese Medicine, Beijing, China.

17 <sup>2</sup> Dongfang Hospital, Beijing University of Chinese Medicine, Beijing, China.

18 <sup>3</sup> Experimental Research Centre, China Academy of Chinese Medical Sciences,  
19 Beijing, China  
20  
21

22  
23 Jianglin Xu, Zhuo Zhang, Yan Li and Jing Liu contributed equally to this work and  
24 should be considered joint first authors.  
25  
26

27 Corresponding Author's information: Qian Lin, e-mail: [linqian62@126.com](mailto:linqian62@126.com), Kun  
28 Zhou, e-mail: [dfzhk@126.com](mailto:dfzhk@126.com)  
29  
30

31 **ABSTRACT**  
32

33 **Introduction** Chronic heart failure (CHF) is a common disease in the worldwide, and  
34 imposes a substantial burden to the health-care system. In CHF, limited exercise  
35 capacity and affected mental well-being leads to a reduced quality of life (QOL). How  
36 to improve the QOL and exercise endurance is critical for CHF patients. Exercise  
37 therapy, such as some traditional Asian exercises (TAEs) including Taichi, Baduanjin  
38 and Yoga, plays an important role in the rehabilitation of patients with CHF. TAE is  
39 suitable for the rehabilitation of patients with CHF because of its soft movements and  
40 can relax the body and mind. Studies have shown that TAE can regulate the overall  
41 health status of the body and tolerate exercise tolerance, improve QOL and reduce  
42 rehospitalization rate in CHF patients. However, the difference in efficacy of TAE in  
43 patients with CHF is not yet clear. The main purpose of this study is to conduct a  
44 network meta-analysis (NMA) of randomised trials to determine the impact of TAE on  
45 CHF patients of different types, different causes and different NYHA heart function  
46 classifications, and to provide references for different types of CHF patients to choose  
47  
48  
49  
50  
51  
52  
53  
54  
55  
56  
57  
58  
59  
60

1  
2  
3 appropriate exercise rehabilitation therapy.  
4  
5  
6

7 **Methods and analysis** The literature search will be retrieved from PubMed, the  
8 Cochrane Library, EMBASE, Web of Science, Chinese National Knowledge  
9 Infrastructure(CNKI), Wan Fang Database, Chinese biomedical literature service  
10 system (SinoMed) and Chinese Scientific Journals Database (VIP) from the date of  
11 their inception until December,31,2020. All randomised controlled trials (RCTs) that  
12 evaluated the effects of three different TAE therapies (Taichi, Baduanjin and Yoga) on  
13 CHF patients will be included. The primary outcomes are exercise capacity [6-min  
14 walking distance(6MWD)], QOL tested with the Minnesota Living with Heart Failure  
15 Questionnaire (MLHF). Secondary outcomes include the levels of N-terminal pro brain  
16 natriuretic peptide(NT-proBNP), left ventricular ejection fraction, systolic blood  
17 pressure, diastolic blood pressure, and peak VO<sub>2</sub>. For included articles, two reviewers  
18 will independently extract the data, and Cochrane Collaboration's tool will be used to  
19 assess risk of bias. We will perform the Bayesian network meta-analyses to pool all  
20 treatment effects. The ranking probabilities for the optimal intervention of various  
21 treatments (Taichi, Baduanjin or Yoga) will be estimated by the mean ranks and surface  
22 under the cumulative ranking curve. Subgroup analysis for different types, different  
23 causes and different NYHA heart function classifications of CHF will be performed.  
24 We will use the Grading of Recommendations Assessment, Development and  
25 Evaluation System to assess the quality of evidence contributing to each network  
26 estimate.  
27  
28  
29  
30  
31  
32  
33  
34  
35  
36  
37  
38  
39  
40  
41  
42  
43  
44  
45

46 **Ethics and dissemination** The results will be disseminated through peer-reviewed  
47 publications. They will provide useful information to inform clinicians on the  
48 potential functions of TAE in CHF, and to provide consolidated evidence for clinical  
49 practice and further research of TAE.  
50  
51  
52  
53

54 **PROSPERO registration number** CRD42020179304  
55  
56  
57  
58  
59  
60

## Strengths and limitations of this study

▶ As far as we know, this will be the first network meta-analysis to compare the various forms of traditional Asian exercise (TAE).

▶ This is the first study to use network meta-analysis to evaluate the effectiveness and differences of TAE (Taichi, Baduanjin and Yoga) in CHF patients.

▶ Due to well established eligible criteria, rigorous data collection and quality assessment, standardized statistical analysis, subgroup and sensitivity analyses, study strength may be increased and heterogeneity may be reduced.

▶ The drawbacks of this study may potentially reside in the changes in the frequency and duration of treatment, which may be result in methodological heterogeneity.

## Background

Chronic heart failure (CHF) refers to a condition that the heart is unable to pump sufficient blood to maintain the body's needs, and is always caused by various cardiopulmonary diseases.<sup>1</sup> CHF is usually associated with high health expenditure and significant morbidity and mortality. Approximately 50% individuals diagnosed with HF will die within 5 years and the high cost of HF-related hospitalization is about \$23 077 per patient in the United States.<sup>2 3</sup> In CHF, limited exercise capacity and affected mental well-being leads to a markedly reduced quality of life (QOL).<sup>4</sup> But progress on new drugs of CHF has been minimal. How to improve the QOL and exercise endurance is critical for CHF patients. More and more regions focus on the prevention and treatment of HF by means of exercise and mental regulation so that patients with CHF can have a longer survival time or a higher QOL.<sup>5</sup>

Traditional Asian exercise (TAE, including Taichi, Baduanjin and Yoga) (figure 1), plays an important role in the rehabilitation of patients with CHF and is suitable for the rehabilitation of patients with CHF because of its soft movements and mind relaxation. TAE has been widely used in China for the prevention of cardiovascular disease and gained popularity in Western countries as an alternative form of exercise. Many studies have demonstrated the safety and efficacy of exercise rehabilitation for CHF, which can reduce mortality and hospitalization rates in patients with CHF, and improve exercise tolerance and QOL in patients<sup>6-8</sup>. Taichi emphasizes on guiding the body movement

1  
2  
3  
4 following people's thoughts. These movements are considered to be low risk  
5 interventions and studies have found positive effects of TAE on exercise load and QOL  
6 in CHF patients. Long-term practice of Taichi can relax the whole body and fully  
7 exercise the bones and muscles. Taichi exercise may benefit patients at all stages of HF,  
8 by enhancing QOL and exercise capacity, and reducing depressive symptoms.<sup>9 10</sup>  
9  
10 Baduanjin is composed of eight different basic movements, which are soft and slow,  
11 smooth and coherent, and suitable for patients with HF. Yoga combines body  
12 movement, breathing and mind control, and proves to improve the QOL in patients with  
13 HF and increase exercise capacity (peak  $VO_2$ ).<sup>11 12</sup> Many published systematic reviews  
14 have focused on specific forms of TAE, such as Taichi or Baduanjin<sup>7 13</sup>.

15  
16 However, the difference in efficacy of TAE in patients with CHF is not yet clear. The  
17 main purpose of this study is to conduct a network meta-analysis (NMA) of randomised  
18 controlled trials (RCTs) to determine the effect of TAE on CHF patients of different  
19 types, different causes and different New York Heart Association (NYHA) heart  
20 function classifications, and to provide references for different types of CHF patients  
21 to choose appropriate exercise rehabilitation therapy.

## 22 23 24 25 26 27 28 29 30 31 32 33 34 35 36 37 **METHODS AND ANALYSIS**

### 38 **Study type:**

39 All RCTs that evaluated the effects of three different TAE therapies (Taichi,  
40 Baduanjin and Yoga) on CHF patients will be included. For cross-over studies and  
41 cluster randomized trials, we will include only the first-phase treatment. Non-RCTs,  
42 duplicate reports, pilot studies and studies lacking primary outcome data will be  
43 excluded.

### 44 45 46 47 48 **Participants:**

49 We will include adults (age  $\geq 18$  years) with stable CHF (NYHA class I-III) based on  
50 WHO's diagnosis of CHF. HF with reduced ejection fraction (HFrEF), HF with mid-  
51 range ejection fraction (HFmrEF) and HF with preserved ejection fraction (HFpEF)  
52 will be included. There are no limitations on the participant's characteristics (such as  
53 sex, comorbidity and treatment course). Patients will be excluded as follows: HF caused  
54 by congenital heart disease, unstable structural valvular diseases, dilated  
55 cardiomyopathy and chronic obstructive pulmonary disease; Patients with unstable  
56  
57  
58  
59  
60

vital signs: resting heart rate >100beats/min and blood pressure >180/110mmHg or <90/60mmHg.

### **Intervention/control:**

Studies reporting TAE : Taichi, Baduanjin and Yoga, any form of exercise such as “simplified 24 forms” , with or without education or usual care, understood as repeated bouts of exercise over time involving more than 1 sessions/week at least will be included. For comparisons, both active (e g, aerobic exercise, endurance training (cycling and walking)) or non-active (e g, usual care, pharmacologic therapy, dietary, exercise counseling and education sessions) controls compared with TAE will be eligible for included. We will also obtain informations from placebo controlled trials.

### **Outcomes:**

#### *Primary outcomes*

1. Exercise capacity tested by 6-min walking distance(6MWD);
2. QOL tested with the Minnesota Living with Heart Failure Questionnaire (MLHF);

#### *Secondary outcomes*

1. Levels of N-terminal pro brain natriuretic peptide (NT-proBNP);
2. Left ventricular ejection fraction (LVEF);
3. Systolic blood pressure (SBP), diastolic blood pressure (DBP);
4. Peak oxygen uptake (peak VO<sub>2</sub>).

### **Search strategy:**

The literature search will be retrieved from PubMed, the Cochrane Library, EMBASE, Web of Science, Chinese National Knowledge Infrastructure(CNKI), Wan Fang Database, Chinese biomedical literature service system (SinoMed) and Chinese Scientific Journals Database (VIP) from the inception to December,31,2020.

The following search terms will be included in the search strategy:(tai chi OR taiji or taiqi OR tai ji quan OR tai chi chuan OR taichi qigong OR shadowboxing OR baduanjin OR Baduanjin exercise OR eight section brocades OR yoga OR yogic OR asana or pranayama OR dhyana)AND(chronic heart failure OR heart failure with reduced ejection fraction OR heart failure with mid-range ejection fraction OR heart failure with preserved ejection fraction OR cardiac failure OR heart failure OR heart decompensation OR right-sided heart failure OR myocardial failure OR congestive heart failure OR left sided heart failure OR ventricular failure). The search strategy for PubMed is shown in [table 1](#). Previous reviews, meta-analyses and relevant references cited in the selected studies will be screened. We will conduct a search of the following trial registers for ongoing or unpublished trials: Chinese Clinical Trial Registry (ChCTR), ClinicalTrials.gov, International Clinical Trials Registry Platform(WHO-



ICTRP). For unpublished or incomplete data, we will contact the original authors to supplement data. The search strategy will be independently conducted by four reviewers (JX, JL, ZZ, KZ), and disagreements will be discussed and solved by consensus or involving a third member of the review team (QL).

**Table1** Search strategy for the PubMed database

| Number. | Search terms                                   |
|---------|------------------------------------------------|
| 1       | tai chi                                        |
| 2       | taiji                                          |
| 3       | taiqi                                          |
| 4       | tai ji quan                                    |
| 5       | tai chi chuan                                  |
| 6       | taichi qigong                                  |
| 7       | shadowboxing                                   |
| 8       | baduanjin                                      |
| 9       | Baduanjin exercise                             |
| 10      | eight section brocades                         |
| 11      | yoga                                           |
| 12      | yogic                                          |
| 13      | asana                                          |
| 14      | pranayama                                      |
| 15      | dhyana                                         |
| 16      | OR 1-15                                        |
| 17      | chronic heart failure                          |
| 18      | heart failure with reduced ejection fraction   |
| 19      | heart failure with mid-range ejection fraction |
| 20      | heart failure with preserved ejection fraction |
| 21      | cardiac failure                                |
| 22      | heart failure                                  |
| 23      | heart decompensation                           |
| 24      | right-sided heart failure                      |
| 25      | myocardial failure                             |
| 26      | congestive heart failure                       |
| 27      | left sided heart failure                       |
| 28      | ventricular failure                            |
| 29      | OR 17-28                                       |
| 30      | 16 and 29                                      |

## Study selection

Endnote X8 will be used to manage literatures and exclude duplicate records. Three reviewers (RF, TM, XJ) will screen the titles and abstracts of all the retrieved articles and remove those failing to meet the eligible criteria independently. They will then get the full texts for potentially eligible studies to further determine whether they fulfil the same eligible criteria. Any disagreements will be resolved by a third review author (JL) for arbitration. The selection process will be described in a PRISMA flow chart(<http://www.prisma-statement.org>) (figure 2).<sup>14</sup>

## Data extraction

We will design a data extraction form from a random sample of three studies to ensure consistency and reduce bias and improve validity and reliability during reviewing. Then modify the form based on the problems in the pilot stage. Four review authors (JX, YL, CH, JJ) will independently extract study characteristics and outcome data from the included studies. Two reviewers (YL, ZZ) will re-check that the data are entered correctly into the final data set. Any disagreements will be resolved by discussion with the whole team or by involving a third review author (KZ).

The following items will be extracted:

1. Study characteristics: lead author, publication year and journal
2. Methods: study design, duration of study, details of trial design (i.e., randomization, allocation concealment, blinding)
3. Participants: sample size, number randomized, number of losing follow-up visits/withdrawing from studies, diagnostic criteria of CHF, mean age, age range, sex, design setting, country, course of treatment and severity of CHF, comorbidities, and inclusion and exclusion criteria.
4. Intervention: intervened measures and control therapy (type of exercise, length, frequency, number of sessions, and duration of each session), response event, non-response event
5. Outcomes: primary and secondary outcomes specified and collected, time points reported, mean value, and mean difference.
6. Miscellaneous: funding source, and notable conflicts of interest of trial authors, register ID.

## Dealing with missing data

We will initially contact authors through email or telephone to obtain any missing data. If we are unable to obtain the data, we will analyze the available data and assess the potential impact of missing data on the study results in the discussion section.

## **Risk of bias assessment**

Three reviewers (JL, XJ, JW) will assess risk of bias in the included studies using the Cochrane Collaboration's tool.<sup>15</sup> We will resolve any disagreements by discussion or another review author. The risk of bias in the following domains will be evaluated: random sequence generation (selection bias), allocation concealment (selection bias), blinding of participants and personnel (performance bias), blinding of outcome assessment (detection bias), incomplete outcome data (attrition bias), selective outcome reporting (reporting bias), and other potential sources of bias (e.g., industry-sponsored funding, lack of individual randomization). We will grade each potential source of bias as high, low, or unclear. Since double-blinding is difficult to achieve in trials, performance bias will likely be present in all trials. For objective outcomes such as NT-proBNP, performance bias and detection bias might not be so critical so that we can grade this trial low risk if bias of other remaining domains is also ranked as low. However, for highly subjective outcomes such as QOL, we may consider that both blinding of participants and outcome assessment are important, and high risk of bias for one or more key domains within a study will be judged as high risk of bias. When it comes to selective outcome reporting, we will grade with regard to the two primary outcomes in our study. Low risk of bias is rated if the number of responders or total dropouts is reported. We will rate at high risk of bias if neither is reported. It will be rated as unclear risk of bias otherwise.

## **Statistical synthesis of study data**

### **Methods for direct treatment comparisons**

We will use DerSimonian–Laird random effects model to perform Standard pairwise meta-analysis. Dichotomous outcomes will be calculated as odds ratio (OR) and continuous data as standardised mean difference (SMD), both with corresponding 95% confidence intervals (CIs). Study heterogeneity will be assessed by Cochran Q test and presented as the  $I^2$ -statistic. Sensitivity analysis of pairwise meta-analysis will be conducted to validate the robustness of the results.

### **Methods for indirect and mixed comparisons**

A random-effects NMA will be conducted within a Bayesian framework.<sup>16</sup> We will use the Markov Chain Monte Carlo algorithm by applying WinBUGS 1.4.3. OR, SMD or weighted mean difference (WMD) will be calculated with 95% CIs. We will obtain a comprehensive ranking of all treatments. The surface under the cumulative ranking curve (SUCRA) and the mean ranks will be used for the treatment hierarchy. We will describe SUCRA with percentages.

### **Examination of assumptions in NMA (consistency, transitivity and heterogeneity)**

We will use local method, global method and node-splitting methods to evaluate

1  
2  
3 consistency. Local method evaluates inconsistency in each closed loop using a loop-  
4 specific approach. Global method compares the difference between consistency and  
5 inconsistency models based on a  $\chi^2$  test using a design-by-treatment approach.<sup>17</sup> The  
6 node splitting method will be used to assess the inconsistency of the model by  
7 separating evidence of one particular comparison into direct and indirect evidence. To  
8 assess global heterogeneity in the network, we will calculate the  $I^2$  and generate  
9 predictive interval plot.<sup>18</sup> Transitivity, a key underlying assumption of NMA, will be  
10 evaluated by comparing the distribution of clinical and methodological variables that  
11 can act as effect modifiers across treatment comparisons.

12 All analyses will be performed using R 3.5.0 (gemtc package, network meta  
13 analysis, assessment of global heterogeneity, network meta regression, and SUCRA  
14 graphs), and STATA 13.0 (pairwise meta-analysis, estimation of inconsistency,  
15 transitivity and local heterogeneity, funnel plot).

### 16 **Subgroup analysis and sensitivity analysis**

17 To assess whether the results were influenced by study characteristics (effect  
18 modifiers), subgroup analysis for primary outcome will be conducted based on age  
19 group, treatment duration, years of CHF, sample size, quality of study, comorbidity and  
20 sponsorship. Subgroup analysis for different types, different causes and different  
21 NYHA heart function classifications of CHF will also be performed. Inconsistent  
22 sources will be explored by performing univariate and multivariate meta-regressions  
23 a network meta-regression. We will conduct sensitivity analysis to exclude trials with  
24 small sample sizes (i.e., arms of less than 10 patients) and remove trials that report the  
25 generation of non-random sequences. All of these analyses were performed in STATA  
26 13.0.

### 27 **Publication bias**

28 Publication bias will be assessed by performing Egger's regression test. Additionally,  
29 a comparison-adjusted funnel plot will be used to investigate whether results in  
30 imprecise trials differ from those in more precise ones.

### 31 **Quality of evidence**

32 Two reviewers(CH, ZZ) will use the GRADE(The Grading of Recommendations  
33 Assessment, Development, and Evaluation) framework to assess the quality of evidence  
34 contributing to each network estimate. The study limitations, imprecision,  
35 inconsistency, indirectness and publication bias will be investigated. Four levels of  
36 quality of evidence will be used: high, moderate, low or very low.

## 37 **DISCUSSION**

38 Taichi, Baduanjin and Yoga CHF is considered to be the end stage of heart disease  
39 manifested with reduced exercise ability and poor QOL. Exercise training is widely  
40 regarded as a non-drug intervention to improve patient's exercise tolerance and QOL.

1  
2  
3  
4  
5  
6  
7  
8  
9  
10  
11  
12  
13  
14  
15  
16  
17  
18  
19  
20  
21  
22  
23  
24  
25  
26  
27  
28  
29  
30  
31  
32  
33  
34  
35  
36  
37  
38  
39  
40  
41  
42  
43  
44  
45  
46  
47  
48  
49  
50  
51  
52  
53  
54  
55  
56  
57  
58  
59  
60

Exercise-based cardiac rehabilitation is safe and effective for CHF. Previous studies have shown that Taichi, Baduanjin and Yoga are beneficial for CHF. Taichi improves body functions,<sup>19</sup> such as lowering blood pressure in adults with hypertension,<sup>20 21</sup> enhancing aerobic endurance<sup>22 23</sup>, reducing stress, anxiety and depression, and ameliorating QOL.<sup>24 25</sup> Baduanjin can reduce the load of the heart, increase the body's ability to transport and utilize oxygen in blood circulation,<sup>26 27</sup> and thus improving HF. Yoga can improve peak VO<sub>2</sub> in CHF patients, which is considered as another method of exercise training for CHF patients.<sup>11</sup>

Therefore, Taichi, Baduanjin and Yoga are effective exercise ways to treat CHF, however, the difference in efficacy of TAE in patients with CHF is not yet clear. We attempt to conduct a NMA of a sufficient number of randomized controlled trials to determine the impact of TAE on CHF patients of different types, different causes and different NYHA heart function classifications, and to provide stronger evidence to help CHF patients choose more appropriate exercise rehabilitation therapy. To our knowledge, this review will be the first to assess the impact of TAE on patients with CHF, and we hope that the results of this study can provide help for the rehabilitation of patients with CHF.

#### **Ethics and dissemination**

This protocol is in accordance with the Preferred Reporting Items for Systematic Reviews and Meta-Analyses (PRISMA) statement, and has been registered at the International Prospective Register of Systematic Reviews (CRD42020179304; available from [https://www.crd.york.ac.uk/PROSPERO/display\\_record.php?RecordID=179304](https://www.crd.york.ac.uk/PROSPERO/display_record.php?RecordID=179304))

As no individual patient data will be used in this NMA, ethical approval is not required. We aim to publish this NMA in a peer-reviewed journal. The results of this NMA will provide a more comprehensive and more reliable information about the effect of TAE for patients with CHF.

#### **Contributors**

QL, KZ, JX, ZZ YL and JL conceived and designed the study. JX and ZZ drafted this protocol. JL YL and ZZ revised it. JW, RF, TM, CH, ZZ, JJ and XJ developed the search strategies and conducted data collection. All authors have read this manuscript and approved the publication of this protocol. Jianglin Xu, Zhuo Zhang, Yan Li and Jing Liu contributed equally to this work and should be considered joint first authors. Both Qian Lin and Kun Zhou are corresponding authors.

**Acknowledgements** We gratefully acknowledge CH and JJ for taking the photo

**Funding** This study was supported by grants from Project of National Natural Science Foundation of China. (No. 81973622).

1  
2  
3 **Competing interests** None declared.

4 **Patient and public involvement** Patients and/or the public were not involved in the  
5 design, or conduct, or reporting, or dissemination plans of this research.

6  
7 **Patient consent for publication** Not required

8  
9 **Competing interests** None declared.

10  
11 **Open access** This is an open access article distributed in accordance with the Creative  
12 Commons Attribution Non Commercial (CC BY-NC 4.0) license, which permits others  
13 to distribute, remix, adapt, build upon this work non-commercially, and license their  
14 derivative works on different terms, provided the original work is properly cited,  
15 appropriate credit is given, any changes made indicated, and the use is non-commercial.  
16 See: <http://creativecommons.org/licenses/by-nc/4.0/>.

### 17 **ORCID iDs**

18 Jianglin Xu <https://orcid.org/0000-0002-2006-7101>

19 Zhuo Zhang <https://orcid.org/0000-0003-4435-8509>

20 Yan Li <https://orcid.org/0000-0002-7619-2809>

21 Jing Liu <https://orcid.org/0000-0002-0729-502X>

22 Tianshi Mao <https://orcid.org/0000-0003-4676-7584>

23 Xiang Ji <https://orcid.org/0000-0003-1305-713X>

24 Kun Zhou <https://orcid.org/0000-0002-4058-7497>

25 Qian Lin <https://orcid.org/0000-0001-9166-5099>

### 26 **References**

- 27 1. Ponikowski P, Voors AA, Anker SD, *et al.* 2016 ESC Guidelines for the diagnosis and  
28 treatment of acute and chronic heart failure: The Task Force for the diagnosis and  
29 treatment of acute and chronic heart failure of the European Society of Cardiology (ESC).  
30 Developed with the special contribution of the Heart Failure Association (HFA) of the ESC.  
31 *Eur J Heart Fail.* 2016;18(8):891-975.
- 32 2. Mozaffarian D, Benjamin EJ, Go AS, *et al.* Heart disease and stroke statistics--2015  
33 update: a report from the American Heart Association. *Circulation.* 2015;131(4):e29-322.
- 34 3. G. W, Z. Z, C. A, *et al.* Costs of heart failure-related hospitalizations in patients aged 18 to  
35 64 years. *Am J Manag Care* 2010;16(10):769-76.
- 36 4. Fleg JL, Cooper LS, Borlaug BA, *et al.* Exercise training as therapy for heart failure: current

- 1  
2  
3  
4 status and future directions. *Circ Heart Fail.* 2015;8(1):209-20.  
5  
6  
7 5. Aggarwal M, Bozkurt B, Panjraht G, *et al.* Lifestyle Modifications for Preventing and  
8  
9 Treating Heart Failure. *J Am Coll Cardiol.* 2018;72(19):2391-405.  
10  
11  
12 6. Taylor-Piliae R, Finley BA. Benefits of Tai Chi Exercise Among Adults With Chronic Heart  
13  
14 Failure: A Systematic Review and Meta-Analysis. *J Cardiovasc Nurs.* 2020;35(5):423-34.  
15  
16  
17 7. Chen X, Marrone G, Olson TP, *et al.* Intensity level and cardiorespiratory responses to  
18  
19 Baduanjin exercise in patients with chronic heart failure. *ESC Heart Fail.* 2020.  
20  
21  
22 8. Pullen PR, Nagamia SH, Mehta PK, *et al.* Effects of yoga on inflammation and exercise  
23  
24 capacity in patients with chronic heart failure. *J Card Fail.* 2008;14(5):407-13.  
25  
26  
27 9. Yeh GY, Wood MJ, Lorell BH, *et al.* Effects of tai chi mind-body movement therapy on  
28  
29 functional status and exercise capacity in patients with chronic heart failure: a randomized  
30  
31 controlled trial. *Am J Med.* 2004;117(8):541-8.  
32  
33  
34  
35 10. Huston P, McFarlane B. Health benefits of tai chi:What is the evidence? *Can Fam*  
36  
37 *Physician.* 2016;62(11):881-90.  
38  
39  
40 11. Gomes-Neto M, Rodrigues ES, Jr., Silva WM, Jr., *et al.* Effects of Yoga in Patients with  
41  
42 Chronic Heart Failure: A Meta-Analysis. *Arq Bras Cardiol.* 2014;103(5):433-9.  
43  
44  
45 12. Hagglund E, Hagerman I, Dencker K, *et al.* Effects of yoga versus hydrotherapy training  
46  
47 on health-related quality of life and exercise capacity in patients with heart failure: A  
48  
49 randomized controlled study. *Eur J Cardiovasc Nurs.* 2017;16(5):381-9.  
50  
51  
52  
53 13. Chen X, Savarese G, Cai Y, *et al.* Tai Chi and Qigong Practices for Chronic Heart Failure:  
54  
55 A Systematic Review and Meta-Analysis of Randomized Controlled Trials. *Evidence-*  
56  
57 *Based Complementary and Alternative Medicine.* 2020;2020:1-15.  
58  
59  
60

- 1  
2  
3  
4 14. Shamseer L, Moher D, Clarke M, *et al.* Preferred reporting items for systematic review and  
5  
6 meta-analysis protocols (PRISMA-P) 2015: elaboration and explanation. *BMJ*.  
7  
8 2015;350:g7647.  
9  
10
- 11 15. Higgins JP, Altman DG, Gotzsche PC, *et al.* The Cochrane Collaboration's tool for  
12  
13 assessing risk of bias in randomised trials. *BMJ*. 2011;343:d5928.  
14  
15
- 16 16. Salanti G. Indirect and mixed-treatment comparison, network, or multiple-treatments  
17  
18 meta-analysis: many names, many benefits, many concerns for the next generation  
19  
20 evidence synthesis tool. *Res Synth Methods*. 2012;3(2):80-97.  
21  
22
- 23 17. Higgins JP, Jackson D, Barrett JK, *et al.* Consistency and inconsistency in network meta-  
24  
25 analysis: concepts and models for multi-arm studies. *Res Synth Methods*. 2012;3(2):98-  
26  
27 110.  
28  
29
- 30 18. A. C, G. S. Visualizing assumptions and results in network meta-analysis: The network  
31  
32 graphs  
33  
34 package. *Stata J*. 2015;15(4):905-50.  
35  
36
- 37 19. Wayne PM, Berkowitz DL, Litrownik DE, *et al.* What do we really know about the safety of  
38  
39 tai chi?: A systematic review of adverse event reports in randomized trials. *Arch Phys Med*  
40  
41 *Rehabil*. 2014;95(12):2470-83.  
42  
43
- 44 20. Chan AWK, Chair SY, Lee DTF, *et al.* Tai Chi exercise is more effective than brisk walking  
45  
46 in reducing cardiovascular disease risk factors among adults with hypertension: A  
47  
48 randomised controlled trial. *Int J Nurs Stud*. 2018;88:44-52.  
49  
50
- 51 21. Sun J, Buys N. Community-Based Mind-Body Meditative Tai Chi Program and Its Effects  
52  
53 on Improvement of Blood Pressure, Weight, Renal Function, Serum Lipoprotein, and  
54  
55  
56  
57  
58  
59  
60



- 1  
2  
3  
4 Quality of Life in Chinese Adults With Hypertension. *Am J Cardiol.* 2015;116(7):1076-81.  
5  
6  
7 22. Zheng G, Li S, Huang M, *et al.* The effect of Tai Chi training on cardiorespiratory fitness in  
8  
9 healthy adults: a systematic review and meta-analysis. *PLoS One.* 2015;10(2):e0117360.  
10  
11  
12 23. Wu W, Liu X, Wang L, *et al.* Effects of Tai Chi on exercise capacity and health-related  
13  
14 quality of life in patients with chronic obstructive pulmonary disease: a systematic review  
15  
16 and meta-analysis. *Int J Chron Obstruct Pulmon Dis.* 2014;9:1253-63.  
17  
18  
19 24. Liu T, Chan AW, Liu YH, *et al.* Effects of Tai Chi-based cardiac rehabilitation on aerobic  
20  
21 endurance, psychosocial well-being, and cardiovascular risk reduction among patients  
22  
23 with coronary heart disease: A systematic review and meta-analysis. *Eur J Cardiovasc*  
24  
25 *Nurs.* 2018;17(4):368-83.  
26  
27  
28  
29 25. Wang C, Bannuru R, Ramel J, *et al.* Tai Chi on psychological well-being: systematic review  
30  
31 and meta-analysis. *BMC Complement Altern Med.* 2010;10:23.  
32  
33  
34  
35 26. Chen MG, Liang X, Kong L, *et al.* Effect of Baduanjin Sequential Therapy on the Quality  
36  
37 of Life and Cardiac Function in Patients with AMI After PCI: A Randomized Controlled Trial.  
38  
39 *Evid Based Complement Alternat Med.* 2020;2020:8171549.  
40  
41  
42  
43 27. XM. S, GL. J, WH. L, *et al.* The influence of baduanjin on cardiopulmonary function during  
44  
45 cardiac rehabilitation for CHD patients. *Med & Pharm J Chin PLA.* 2017;29(2):24-7.  
46  
47  
48  
49

## Figure legend

50  
51  
52 **Figure 1** Presentation of three traditional Asian exercise (A) Taichi , (B) Baduanjin, and (C)  
53  
54 Yoga. The pictured individual has agreed to publish his image.

55  
56 **Figure 2** Flowchart of the study selection process.  
57  
58  
59  
60

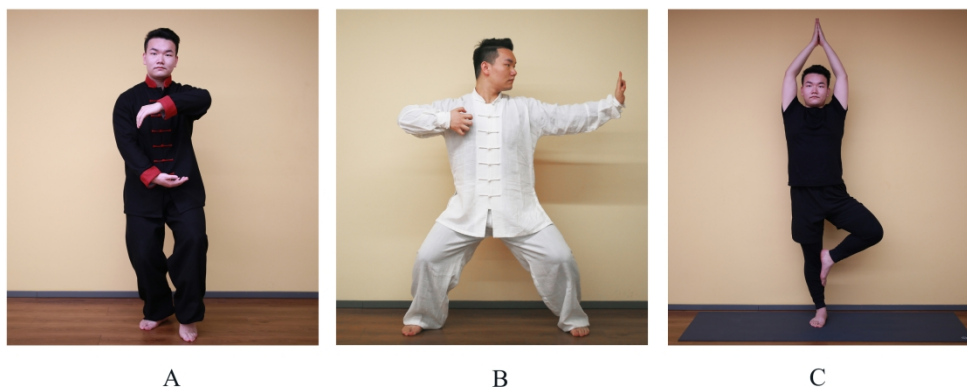

Figure 1 Presentation of three traditional Asian exercise (A) Tai chi, (B) Baduanjin, and (C) Yoga. The pictured individual has agreed to publish his image.

169x72mm (600 x 600 DPI)

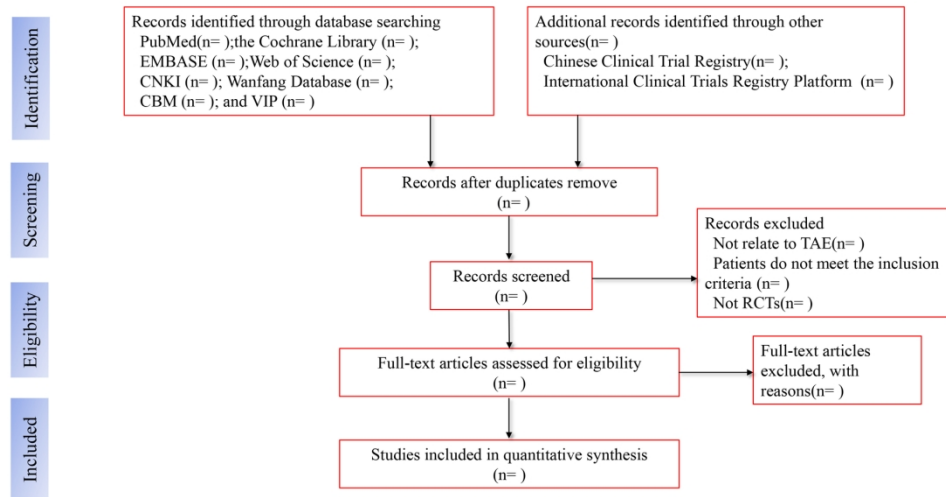

Figure 2 Flowchart of the study selection process.

169x90mm (300 x 300 DPI)

# BMJ Open

## Effect of traditional Asian exercise on patients with chronic heart failure: a protocol for network meta-analysis of randomised controlled trials

|                                 |                                                                                                                                                                                                                                                                                                                                                                                                                                                                                                                                                                                                                                                                                                                                                                                                                                                                                                                                    |
|---------------------------------|------------------------------------------------------------------------------------------------------------------------------------------------------------------------------------------------------------------------------------------------------------------------------------------------------------------------------------------------------------------------------------------------------------------------------------------------------------------------------------------------------------------------------------------------------------------------------------------------------------------------------------------------------------------------------------------------------------------------------------------------------------------------------------------------------------------------------------------------------------------------------------------------------------------------------------|
| Journal:                        | <i>BMJ Open</i>                                                                                                                                                                                                                                                                                                                                                                                                                                                                                                                                                                                                                                                                                                                                                                                                                                                                                                                    |
| Manuscript ID                   | bmjopen-2021-048891.R1                                                                                                                                                                                                                                                                                                                                                                                                                                                                                                                                                                                                                                                                                                                                                                                                                                                                                                             |
| Article Type:                   | Protocol                                                                                                                                                                                                                                                                                                                                                                                                                                                                                                                                                                                                                                                                                                                                                                                                                                                                                                                           |
| Date Submitted by the Author:   | 05-Jul-2021                                                                                                                                                                                                                                                                                                                                                                                                                                                                                                                                                                                                                                                                                                                                                                                                                                                                                                                        |
| Complete List of Authors:       | Xu, Jianglin; Beijing University of Chinese Medicine, Dongzhimen Hospital<br>Zhang, Zhuo; Beijing University of Chinese Medicine, Dongzhimen Hospital<br>Li, Yan; Beijing University of Chinese Medicine, Dongfang Hospital<br>LIU, Jing; Beijing University of Chinese Medicine, Dongfang Hospital<br>Wan, Jie; Beijing University of Chinese Medicine, Dongfang Hospital<br>Feng, RuLi; Beijing University of Chinese Medicine, Dongzhimen Hospital<br>Jin, Jialin; Beijing University of Chinese Medicine, Dongzhimen Hospital<br>Huang, Cong; China Academy of Chinese Medical Sciences, Experimental Research Centre<br>Mao, Tianshi; Beijing University of Chinese Medicine, Dongzhimen Hospital<br>Ji, Xiang; Beijing University of Chinese Medicine, Dongzhimen Hospital<br>Zhou, Kun; Beijing University of Chinese Medicine, Dongfang Hospital<br>qian, lin; Beijing University of Chinese Medicine, Dongzhimen Hospital |
| <b>Primary Subject Heading</b>: | Sports and exercise medicine                                                                                                                                                                                                                                                                                                                                                                                                                                                                                                                                                                                                                                                                                                                                                                                                                                                                                                       |
| Secondary Subject Heading:      | Cardiovascular medicine                                                                                                                                                                                                                                                                                                                                                                                                                                                                                                                                                                                                                                                                                                                                                                                                                                                                                                            |
| Keywords:                       | REHABILITATION MEDICINE, Heart failure < CARDIOLOGY, COMPLEMENTARY MEDICINE                                                                                                                                                                                                                                                                                                                                                                                                                                                                                                                                                                                                                                                                                                                                                                                                                                                        |
|                                 |                                                                                                                                                                                                                                                                                                                                                                                                                                                                                                                                                                                                                                                                                                                                                                                                                                                                                                                                    |

SCHOLARONE™  
Manuscripts



I, the Submitting Author has the right to grant and does grant on behalf of all authors of the Work (as defined in the below author licence), an exclusive licence and/or a non-exclusive licence for contributions from authors who are: i) UK Crown employees; ii) where BMJ has agreed a CC-BY licence shall apply, and/or iii) in accordance with the terms applicable for US Federal Government officers or employees acting as part of their official duties; on a worldwide, perpetual, irrevocable, royalty-free basis to BMJ Publishing Group Ltd ("BMJ") its licensees and where the relevant Journal is co-owned by BMJ to the co-owners of the Journal, to publish the Work in this journal and any other BMJ products and to exploit all rights, as set out in our [licence](#).

The Submitting Author accepts and understands that any supply made under these terms is made by BMJ to the Submitting Author unless you are acting as an employee on behalf of your employer or a postgraduate student of an affiliated institution which is paying any applicable article publishing charge ("APC") for Open Access articles. Where the Submitting Author wishes to make the Work available on an Open Access basis (and intends to pay the relevant APC), the terms of reuse of such Open Access shall be governed by a Creative Commons licence – details of these licences and which [Creative Commons](#) licence will apply to this Work are set out in our licence referred to above.

Other than as permitted in any relevant BMJ Author's Self Archiving Policies, I confirm this Work has not been accepted for publication elsewhere, is not being considered for publication elsewhere and does not duplicate material already published. I confirm all authors consent to publication of this Work and authorise the granting of this licence.

1  
2  
3  
4 **Effect of traditional Asian exercise on patients with chronic heart**  
5  
6 **failure: a protocol for network meta-analysis of randomised controlled**  
7  
8 **trials**  
9  
10

11  
12 Jianglin Xu,<sup>1</sup> Zhuo Zhang,<sup>1</sup> Yan Li,<sup>2</sup> Jing Liu,<sup>2</sup> Jie Wan,<sup>2</sup> Ruli Feng,<sup>1</sup> Jialin Jin,<sup>1</sup> Cong  
13 Huang,<sup>3</sup> Tianshi Mao,<sup>1</sup> Xiang Ji,<sup>1</sup> Kun Zhou,<sup>2\*</sup> Qian Lin<sup>1\*</sup>  
14  
15

16 <sup>1</sup> Dongzhimen Hospital, Beijing University of Chinese Medicine, Beijing, China.

17 <sup>2</sup> Dongfang Hospital, Beijing University of Chinese Medicine, Beijing, China.

18 <sup>3</sup> Experimental Research Centre, China Academy of Chinese Medical Sciences,  
19 Beijing, China  
20  
21

22  
23 Jianglin Xu, Zhuo Zhang, Yan Li and Jing Liu contributed equally to this work and  
24 should be considered joint first authors.  
25  
26

27 Corresponding Author's information: Qian Lin, e-mail: [linqian62@126.com](mailto:linqian62@126.com), Kun  
28 Zhou, e-mail: [dfzhk@126.com](mailto:dfzhk@126.com)  
29  
30

31 **ABSTRACT**  
32

33 **Introduction** Chronic heart failure (CHF) is a common disease worldwide, and  
34 imposes a substantial burden to the health-care system. In CHF, limited exercise  
35 capacity and affected mental well-being leads to a reduced quality of life (QOL). How  
36 to improve the QOL and exercise endurance is critical for CHF patients. Exercise  
37 therapy, such as some traditional Asian exercises (TAEs) including Taichi, Baduanjin  
38 and Yoga, plays an important role in the rehabilitation of patients with CHF. TAE is  
39 suitable for the rehabilitation of patients with CHF because of its soft movements and  
40 can relax the body and mind. Studies have shown that TAE can regulate the overall  
41 health status of the body and exercise tolerance, improve QOL and reduce  
42 rehospitalization rate in CHF patients. However, the difference in efficacy of TAE in  
43 patients with CHF is not yet clear. The main purpose of this study is to conduct a  
44 network meta-analysis (NMA) of randomised trials to determine the impact of TAE on  
45 CHF patients of different types, different causes and different NYHA heart function  
46 classifications, and to provide references for different types of CHF patients to choose  
47  
48  
49  
50  
51  
52  
53  
54  
55  
56  
57  
58  
59  
60

1  
2  
3  
4 appropriate exercise rehabilitation therapy.  
5  
6

7  
8 **Methods and analysis** The literature search will be retrieved from PubMed, the  
9 Cochrane Library, EMBASE, Web of Science, Chinese National Knowledge  
10 Infrastructure(CNKI), Wan Fang Database, Chinese biomedical literature service  
11 system (SinoMed) and Chinese Scientific Journals Database (VIP) from the date of  
12 their inception until August 1,2021. All randomised controlled trials (RCTs) that  
13 evaluated the effects of three different TAE therapies (Taichi, Baduanjin and Yoga) on  
14 CHF patients will be included. The primary outcomes are exercise capacity [6-min  
15 walking distance(6MWD)], QOL tested with the Minnesota Living with Heart Failure  
16 Questionnaire (MLHF). Secondary outcomes include the levels of N-terminal pro brain  
17 natriuretic peptide(NT-proBNP), left ventricular ejection fraction, systolic blood  
18 pressure, diastolic blood pressure, and peak VO<sub>2</sub>. For included articles, two reviewers  
19 will independently extract the data, and Cochrane Collaboration's tool will be used to  
20 assess risk of bias. We will perform the Bayesian network meta-analyses to pool all  
21 treatment effects. The ranking probabilities for the optimal intervention of various  
22 treatments (Taichi, Baduanjin or Yoga) will be estimated by the mean ranks and surface  
23 under the cumulative ranking curve. Subgroup analysis for different types, different  
24 causes and different NYHA heart function classifications of CHF will be performed.  
25 We will use the Grading of Recommendations Assessment, Development and  
26 Evaluation System to assess the quality of evidence contributing to each network  
27 estimate.  
28  
29

30  
31  
32  
33  
34  
35  
36  
37  
38  
39  
40  
41  
42  
43  
44  
45  
46 **Ethics and dissemination** The results will be disseminated through peer-reviewed  
47 publications. They will provide useful information to inform clinicians on the potential  
48 functions of TAE in CHF, and to provide consolidated evidence for clinical practice  
49 and further research of TAE.  
50  
51  
52  
53

54 **PROSPERO registration number** CRD42020179304  
55  
56  
57  
58  
59  
60

## Strengths and limitations of this study

▶ As far as we know, this will be the first network meta-analysis to compare the various forms of traditional Asian exercise (TAE).

▶ This is the first study to use network meta-analysis to evaluate the effectiveness and differences of TAE (Taichi, Baduanjin and Yoga) in CHF patients.

▶ Due to well established eligible criteria, rigorous data collection and quality assessment, standardized statistical analysis, subgroup and sensitivity analyses, study strength may be increased and heterogeneity may be reduced.

▶ The drawbacks of this study may potentially reside in the changes in the frequency and duration of treatment, which may be result in methodological heterogeneity.

## Background

Chronic heart failure (CHF) refers to a condition that the heart is unable to pump sufficient blood to maintain the body's needs, and is always caused by various cardiopulmonary diseases.<sup>1</sup> CHF is usually associated with high cost and significant morbidity and mortality. Approximately 50% individuals diagnosed with HF will die within 5 years and the high cost of HF-related hospitalization is about \$23 077 per patient in the United States.<sup>2 3</sup> In CHF, limited exercise capacity and affected mental well-being leads to a markedly reduced quality of life (QOL).<sup>4</sup> But progress on new drugs of CHF has been minimal. How to improve the QOL and exercise endurance is critical for CHF patients. More and more regions focus on the prevention and treatment of HF by means of exercise and mental regulation so that patients with CHF can have a longer survival time or a higher QOL.<sup>5</sup>

Traditional Asian exercise (TAE, including Taichi, Baduanjin and Yoga) (figure 1), plays an important role in the rehabilitation of patients with CHF and is suitable for the rehabilitation of patients with CHF because of its soft movements and mind relaxation. TAE has been widely used in China for the prevention of cardiovascular disease and gained popularity in Western countries as an alternative form of exercise. Many studies have demonstrated the safety and efficacy of exercise rehabilitation for CHF, which can reduce mortality and hospitalization rates in patients with CHF, and improve exercise tolerance and QOL in patients.<sup>6-8</sup> Taichi emphasizes on guiding the body movement following people's thoughts. These movements are considered to be low risk



1  
2  
3  
4 interventions and studies have found positive effects of TAE on exercise load and QOL  
5 in CHF patients.<sup>9 10</sup> Long-term practice of Taichi can relax the whole body and fully  
6 exercise the bones and muscles. Taichi exercise may benefit patients at all stages of HF,  
7 by enhancing QOL and exercise capacity, and reducing depressive symptoms.<sup>11 12</sup>  
8  
9 Baduanjin is composed of eight different basic movements, which are soft and slow,  
10 smooth and coherent, and suitable for patients with HF. Yoga combines body  
11 movement, breathing and mind control, and proves to improve the QOL in patients with  
12 HF and increase exercise capacity (peak VO<sub>2</sub>).<sup>9 13</sup> Many published systematic reviews  
13 have focused on specific forms of TAE, such as Taichi or Baduanjin.<sup>7 10</sup>

21 Exercise intensity is closely related to the pumping ability of the heart, endothelial  
22 system and mitochondrial function in skeletal muscle, which is the cause for influencing  
23 peak VO<sub>2</sub>.<sup>14</sup> Taichi and Baduanjin can be classified as a mild to moderate form of  
24 exercise intensity, while Yoga is as moderate form of exercise intensity.<sup>15 16</sup> Moreover,  
25 participants of Yoga may only perform breathing exercises or meditate at the same time.  
26  
27 This is different from Tai Chi and Baduanjin, which emphasis on the coordination of  
28 breathing and exercise. Recently, a large cohort studies showed that a strong and dose-  
29 dependent association of physical activity with HF with preserved ejection fraction  
30 (HFpEF) but not with HF with reduced ejection fraction (HFrEF).<sup>17</sup> Further consider  
31 the diversity of the etiology of HFrEF and HFpEF. Therefore, TAE may have different  
32 effects on different types, different causes and different New York Heart Association  
33 (NYHA) heart function classifications of CHF.

44 The main purpose of this study is to conduct a network meta-analysis (NMA) of  
45 randomised controlled trials (RCTs) to determine the effect of TAE on CHF patients of  
46 different types, different causes and different New York Heart Association (NYHA)  
47 heart function classifications, and to provide references for different types of CHF  
48 patients to choose appropriate exercise rehabilitation therapy.  
49  
50  
51  
52  
53  
54

## 56 **METHODS AND ANALYSIS**

### 57 **Design**

58 This study will be reported following the Preferred Reporting Items for Systematic  
59  
60

1  
2  
3 Review and Meta-Analysis Protocols (PRISMA-P) guidelines (supplemental file 1).  
4  
5

### 6 7 **Study type**

8 All RCTs that evaluated the effects of three different TAE therapies (Taichi, Baduanjin  
9 and Yoga) on CHF patients will be included. For cross-over studies and cluster  
10 randomized trials, we will include only the first-phase treatment. Non-RCTs, duplicate  
11 reports, pilot studies and studies lacking primary outcome data will be excluded.  
12  
13

### 14 15 **Participants**

16 We will include adults (age $\geq$ 18 years) with stable CHF (NYHA class I-III) based on  
17 WHO's diagnosis of CHF. HFrEF [left ventricular ejection fraction (LVEF) $<$ 40%], HF  
18 with mid-range ejection fraction (HFmrEF, 40% $\leq$ LVEF $\leq$ 49%) and HFpEF (LVEF $\geq$   
19 50%) will be included. There are no limitations on the participant's characteristics (such  
20 as sex, comorbidity and treatment course). Patients will be excluded as follows: HF  
21 caused by congenital heart disease, unstable structural valvular diseases, dilated  
22 cardiomyopathy and chronic obstructive pulmonary disease; Patients with unstable  
23 vital signs: resting heart rate $>$ 100beats/min and blood pressure  $>$ 180/110mmHg or  
24  $<$ 90/60mmHg.  
25  
26  
27  
28  
29  
30  
31  
32

### 33 34 **Intervention/control**

35 Studies reporting TAE : Taichi, Baduanjin and Yoga, any form of exercise such as  
36 "simplified 24 forms" , with or without education or usual care, understood as repeated  
37 bouts of exercise over time involving more than 4 weeks at least will be included. For  
38 comparisons, both active (e g, aerobic exercise, endurance training (cycling and  
39 walking)) or non-active (e g, usual care, pharmacologic therapy, dietary, exercise  
40 counseling, education sessions and psychosocial interventions) controls compared with  
41 TAE will be eligible for included. We will also obtain informations from placebo  
42 controlled trials.  
43  
44  
45  
46  
47

### 48 49 **Outcomes**

#### 50 *Primary outcomes*

- 51 1. Peak oxygen uptake (peak  $VO_2$ );
- 52 2. Exercise capacity tested by 6-min walking distance(6MWD);
- 53 3. QOL tested with the Minnesota Living with Heart Failure Questionnaire (MLHF);

#### 54 *Secondary outcomes*

- 55 1. Levels of N-terminal pro brain natriuretic peptide (NT-proBNP);
  - 56 2. LVEF;
  - 57 3. Systolic blood pressure (SBP), diastolic blood pressure (DBP);
- 58  
59  
60

## Search strategy

The literature search will be retrieved from PubMed, the Cochrane Library, EMBASE, Web of Science, Chinese National Knowledge Infrastructure(CNKI), Wan Fang Database, Chinese biomedical literature service system (SinoMed) and Chinese Scientific Journals Database (VIP) from the inception to August 1,2021.

The following search terms will be included in the search strategy:(tai chi OR taiji or taiqi OR tai ji quan OR tai chi chuan OR taichi qigong OR shadowboxing OR baduanjin OR Baduanjin exercise OR eight section brocades OR yoga OR yogic OR asana or pranayama OR dhyana)AND(chronic heart failure OR heart failure with reduced ejection fraction OR heart failure with mid-range ejection fraction OR heart failure with preserved ejection fraction OR cardiac failure OR heart failure OR heart decompensation OR right-sided heart failure OR myocardial failure OR congestive heart failure OR left sided heart failure OR ventricular failure). The search strategy for PubMed is shown in table 1 and supplemental file 2. Previous reviews, meta-analyses and relevant references cited in the selected studies will be screened. We will conduct a search of the following trial registers for ongoing or unpublished trials: Chinese Clinical Trial Registry (ChCTR), ClinicalTrials.gov, International Clinical Trials Registry Platform(WHO-ICTRP). For unpublished or incomplete data, we will contact the original authors to supplement data. The search strategy will be independently conducted by four reviewers (JX, JL, ZZ, KZ), and disagreements will be discussed and solved by consensus or involving a third member of the review team (QL).

**Table1** Search strategy for the PubMed database

| Number. | Search terms           |
|---------|------------------------|
| 1       | tai chi                |
| 2       | taiji                  |
| 3       | taiqi                  |
| 4       | tai ji quan            |
| 5       | tai chi chuan          |
| 6       | taichi qigong          |
| 7       | shadowboxing           |
| 8       | baduanjin              |
| 9       | Baduanjin exercise     |
| 10      | eight section brocades |
| 11      | yoga                   |
| 12      | yogic                  |
| 13      | asana                  |

|    |                                                |
|----|------------------------------------------------|
| 14 | pranayama                                      |
| 15 | dhyana                                         |
| 16 | OR 1-15                                        |
| 17 | chronic heart failure                          |
| 18 | heart failure with reduced ejection fraction   |
| 19 | heart failure with mid-range ejection fraction |
| 20 | heart failure with preserved ejection fraction |
| 21 | cardiac failure                                |
| 22 | heart failure                                  |
| 23 | heart decompensation                           |
| 24 | right-sided heart failure                      |
| 25 | myocardial failure                             |
| 26 | congestive heart failure                       |
| 27 | left sided heart failure                       |
| 28 | ventricular failure                            |
| 29 | OR 17-28                                       |
| 30 | 16 and 29                                      |

### Study selection

Endnote X8 will be used to manage literatures and exclude duplicate records. Three reviewers (RF, TM, XJ) will screen the titles and abstracts of all the retrieved articles and remove those failing to meet the eligible criteria independently. They will then get the full texts for potentially eligible studies to further determine whether they fulfil the same eligible criteria. Any disagreements will be resolved by a third review author (JL) for arbitration. The selection process will be described in a PRISMA flow chart(<http://www.prisma-statement.org>) (figure 2).<sup>18</sup>

### Data extraction

We will design a data extraction form from a random sample of three studies to ensure consistency and reduce bias and improve validity and reliability during reviewing. Then modify the form based on the problems in the pilot stage. Four review authors (JX, YL, CH, JJ) will independently extract study characteristics and outcome data from the included studies. Two reviewers (YL, ZZ) will re-check that the data are entered correctly into the final data set. Any disagreements will be resolved by discussion with the whole team or by involving a third review author (KZ).

The following items will be extracted:

1. Study characteristics: lead author, publication year and journal
2. Methods: study design, duration of study, details of trial design (i.e.,

1  
2  
3 randomization, allocation concealment, blinding)

4  
5 3. Participants: sample size, number randomized, number of losing follow-up  
6 visits/withdrawing from studies, diagnostic criteria of CHF, mean age, age range, sex,  
7 design setting, country, course of treatment and severity of CHF, comorbidities, and  
8 inclusion and exclusion criteria.  
9

10  
11 4. Intervention: intervened measures (type of exercise, length, frequency, number  
12 of sessions, and duration of each session), cointerventions, studies with education  
13 components and comparators [both active (e g, aerobic exercise, endurance training  
14 (cycling and walking)) or non-active (e g, usual care, pharmacologic therapy, dietary,  
15 exercise counseling and psychosocial interventions)].  
16  
17

18  
19 5. Outcomes: primary and secondary outcomes specified and collected, time points  
20 reported, mean value, and mean difference.  
21

22 6. Miscellaneous: funding source, and notable conflicts of interest of trial authors,  
23 register ID.  
24  
25

## 26 **Dealing with missing data**

27 We will initially contact authors through email or telephone to obtain any missing  
28 data. If we are unable to obtain the data, we will analyze the available data and assess  
29 the potential impact of missing data on the study results in the discussion section.  
30  
31

## 32 **Risk of bias assessment**

33  
34 Three reviewers (JL, XJ, JW) will assess risk of bias in the included studies using  
35 the Cochrane Collaboration's Risk of Bias tool (RoB2).<sup>19</sup> We will resolve any  
36 disagreements by discussion or another review author. The risk of bias in the following  
37 domains will be evaluated: randomisation process, deviations from intended  
38 interventions, missing outcome data, measurement of the outcome selection of the  
39 reported result and overall risk.  
40  
41  
42  
43  
44

## 45 **Statistical synthesis of study data**

### 46 **Methods for direct treatment comparisons**

47  
48 We will use DerSimonian–Laird random effects model to perform Standard pairwise  
49 meta-analysis. Dichotomous outcomes will be calculated as odds ratio (OR) and  
50 continuous data as standardised mean difference (SMD), both with corresponding 95%  
51 confidence intervals (CIs). Study heterogeneity will be assessed by Cochran Q test and  
52 presented as the  $I^2$ -statistic. Sensitivity analysis of pairwise meta-analysis will be  
53 conducted to validate the robustness of the results.  
54  
55

### 56 **Methods for indirect and mixed comparisons**

57  
58 A random-effects NMA will be conducted within a Bayesian framework.<sup>20</sup> We will  
59 use the Markov Chain Monte Carlo algorithm by applying WinBUGS 1.4.3. OR, SMD  
60

1  
2  
3 or weighted mean difference (WMD) will be calculated with 95% CIs. We will obtain  
4 a comprehensive ranking of all treatments. The surface under the cumulative ranking  
5 curve (SUCRA) and the mean ranks will be used for the treatment hierarchy. We will  
6 describe SUCRA with percentages.  
7  
8

### 9 **Examination of assumptions in NMA (consistency, transitivity and** 10 **heterogeneity)**

11 We will use local method, global method and node-splitting methods to evaluate  
12 consistency. Local method evaluates inconsistency in each closed loop using a loop-  
13 specific approach. Global method compares the difference between consistency and  
14 inconsistency models based on a  $\chi^2$  test using a design-by-treatment approach.<sup>21</sup> The  
15 node splitting method will be used to assesses the inconsistency of the model by  
16 separating evidence of one particular comparison into direct and indirect evidence. To  
17 assess global heterogeneity in the network, we will calculate the  $I^2$  and generate  
18 predictive interval plot.<sup>22</sup> Transitivity, a key underlying assumption of NMA, will be  
19 evaluated by comparing the distribution of clinical and methodological variables that  
20 can act as effect modifiers across treatment comparisons.  
21  
22

23 All analyses will be performed using R 3.5.0 (gemtc package, network meta  
24 analysis, assessment of global heterogeneity, network meta regression, and SUCRA  
25 graphs), and STATA 13.0 (pairwise meta-analysis, estimation of inconsistency,  
26 transitivity and local heterogeneity, funnel plot).  
27  
28

### 29 **Subgroup analysis and sensitivity analysis**

30 To assess whether the results were influenced by study characteristics (effect  
31 modifiers), subgroup analysis for primary outcome will be conducted based on age  
32 group, treatment duration, years of CHF, sample size, quality of study, comorbidity and  
33 sponsorship. Subgroup analysis for different types, different causes and different  
34 NYHA heart function classifications of CHF will also be performed. Inconsistent  
35 sources will be explored by performing univariate and multivariate meta-regressions a  
36 network meta-regression. We will conduct sensitivity analysis to exclude trials with  
37 small sample sizes (i.e., arms of less than 10 patients) and remove trails that report the  
38 generation of non-random sequences. All of these analyses were performed in STATA  
39 13.0. If data extraction is insufficient, a qualitative synthesis will be created.  
40  
41  
42  
43  
44  
45  
46  
47  
48  
49

### 50 **Publication bias**

51 Publication bias will be assessed by performing Egger's regression test. Additionally,  
52 a comparison-adjusted funnel plot will be used to investigate whether results in  
53 imprecise trials differ from those in more precise ones.  
54  
55

### 56 **Quality of evidence**

57 Two reviewers(CH, ZZ) will use the GRADE(The Grading of Recommendations  
58 Assessment, Development, and Evaluation) framework to assess the certainty of  
59 evidence contributing to each network estimate. The study limitations, imprecision,  
60

1  
2  
3 inconsistency, indirectness and publication bias will be investigated. Four levels of  
4 quality of evidence will be used: high, moderate, low or very low.  
5

#### 6 **Timelines**

7  
8 The study will be conducted from January 1, 2021 to December 31, 2021.

#### 9 **Patient and public involvement**

10  
11 Patients and/or the public were not involved in the design, or conduct, or reporting,  
12 or dissemination plans of this research.  
13  
14  
15  
16

## 17 **DISCUSSION**

18 CHF is considered to be the end stage of heart disease manifested with reduced  
19 exercise ability and poor QOL. Exercise training is widely regarded as a non-drug  
20 intervention to improve patient's exercise tolerance and QOL. Exercise-based cardiac  
21 rehabilitation is safe and effective for CHF. Previous studies have shown that Taichi,  
22 Baduanjin and Yoga are beneficial for CHF. Taichi improves body functions,<sup>23</sup> such as  
23 lowering blood pressure in adults with hypertension,<sup>24 25</sup> enhancing aerobic endurance<sup>26</sup>  
24 <sup>27</sup>,reducing stress, anxiety and depression, and ameliorating QOL.<sup>28 29</sup> Baduanjin can  
25 reduce the load of the heart, increase the body's ability to transport and utilize oxygen  
26 in blood circulation,<sup>30 31</sup> and thus improving HF. Yoga can improve peak VO<sub>2</sub> in CHF  
27 patients, which is considered as another method of exercise training for CHF patients.<sup>9</sup>  
28  
29

30  
31 Therefore, Taichi, Baduanjin and Yoga are effective exercise ways to treat CHF,  
32 however, the difference in efficacy of TAE in patients with CHF is not yet clear. We  
33 attempt to conduct a NMA of a sufficient number of randomized controlled trials to  
34 determine the impact of TAE on CHF patients of different types, different causes and  
35 different NYHA heart function classifications, and to provide stronger evidence to help  
36 CHF patients choose more appropriate exercise rehabilitation therapy. To our  
37 knowledge, this review will be the first to assess the impact of TAE on patients with  
38 CHF, and we hope that the results of this study can provide help for the rehabilitation  
39 of patients with CHF.  
40  
41  
42  
43  
44  
45  
46  
47

#### 48 **Ethics and dissemination**

49 This protocol is in accordance with the Preferred Reporting Items for Systematic  
50 Reviews and Meta-Analyses (PRISMA) statement, and has been registered at the  
51 International Prospective Register of Systematic Reviews (CRD42020179304;  
52 available from [https://www.crd.york.ac.uk/PROSPERO/display\\_record.php?Record](https://www.crd.york.ac.uk/PROSPERO/display_record.php?RecordID=179304)  
53 ID=179304)  
54  
55

56  
57 As no individual patient data will be used in this NMA, ethical approval is not  
58 required. We aim to publish this NMA in a peer-reviewed journal. The results of this  
59 NMA will provide a more comprehensive and more reliable information about the  
60

effect of TAE for patients with CHF.

### Contributors

QL, KZ, JX, ZZ YL and JL conceived and designed the study. JX and ZZ drafted this protocol. JL YL and ZZ revised it. JW, RF, TM, CH, ZZ, JJ and XJ developed the search strategies and conducted data collection. All authors have read this manuscript and approved the publication of this protocol. Jianglin Xu, Zhuo Zhang, Yan Li and Jing Liu contributed equally to this work and should be considered joint first authors. Both Qian Lin and Kun Zhou are corresponding authors.

**Acknowledgements** We gratefully acknowledge CH and JJ for taking the photo

**Funding** This study was supported by grants from Project of National Natural Science Foundation of China. (No. 81903993 and No. 81973622).

**Competing interests** None declared.

**Patient consent for publication** Not required

**Competing interests** None declared.

**Open access** This is an open access article distributed in accordance with the Creative Commons Attribution Non Commercial (CC BY-NC 4.0) license, which permits others to distribute, remix, adapt, build upon this work non-commercially, and license their derivative works on different terms, provided the original work is properly cited, appropriate credit is given, any changes made indicated, and the use is non-commercial. See: <http://creativecommons.org/licenses/by-nc/4.0/>.

### ORCID iDs

Jianglin Xu <https://orcid.org/0000-0002-2006-7101>

Zhuo Zhang <https://orcid.org/0000-0003-4435-8509>

Yan Li <https://orcid.org/0000-0002-7619-2809>

Jing Liu <https://orcid.org/0000-0002-0729-502X>

Tianshi Mao <https://orcid.org/0000-0003-4676-7584>

Xiang Ji <https://orcid.org/0000-0003-1305-713X>

Kun Zhou <https://orcid.org/0000-0002-4058-7497>

Qian Lin <https://orcid.org/0000-0001-9166-5099>

### References

1. Ponikowski P, Voors AA, Anker SD, *et al.* 2016 ESC Guidelines for the diagnosis and treatment of acute and chronic heart failure: The Task Force for the diagnosis and treatment of acute and chronic heart failure of the European Society of Cardiology (ESC). Developed with the special contribution of the Heart Failure Association (HFA) of the ESC.



- 1  
2  
3  
4 *Eur J Heart Fail.* 2016;18(8):891-975.  
5  
6  
7 2. Mozaffarian D, Benjamin EJ, Go AS, *et al.* Heart disease and stroke statistics--2015  
8  
9 update: a report from the American Heart Association. *Circulation.* 2015;131(4):e29-322.  
10  
11  
12 3. G. W, Z. Z, C. A, *et al.* Costs of heart failure-related hospitalizations in patients aged 18 to  
13  
14 64 years. *Am J Manag Care* 2010;16(10):769-76.  
15  
16  
17 4. Fleg JL, Cooper LS, Borlaug BA, *et al.* Exercise training as therapy for heart failure: current  
18  
19 status and future directions. *Circ Heart Fail.* 2015;8(1):209-20.  
20  
21  
22 5. Aggarwal M, Bozkurt B, Panjra G, *et al.* Lifestyle Modifications for Preventing and  
23  
24 Treating Heart Failure. *J Am Coll Cardiol.* 2018;72(19):2391-405.  
25  
26  
27 6. Taylor-Piliae R, Finley BA. Benefits of Tai Chi Exercise Among Adults With Chronic Heart  
28  
29 Failure: A Systematic Review and Meta-Analysis. *J Cardiovasc Nurs.* 2020;35(5):423-34.  
30  
31  
32 7. Chen X, Marrone G, Olson TP, *et al.* Intensity level and cardiorespiratory responses to  
33  
34 Baduanjin exercise in patients with chronic heart failure. *ESC Heart Fail.* 2020.  
35  
36  
37 8. Pullen PR, Nagamia SH, Mehta PK, *et al.* Effects of yoga on inflammation and exercise  
38  
39 capacity in patients with chronic heart failure. *J Card Fail.* 2008;14(5):407-13.  
40  
41  
42 9. Gomes-Neto M, Rodrigues ES, Jr., Silva WM, Jr., *et al.* Effects of Yoga in Patients with  
43  
44 Chronic Heart Failure: A Meta-Analysis. *Arq Bras Cardiol.* 2014;103(5):433-9.  
45  
46  
47 10. Chen X, Savarese G, Cai Y, *et al.* Tai Chi and Qigong Practices for Chronic Heart Failure:  
48  
49 A Systematic Review and Meta-Analysis of Randomized Controlled Trials. *Evidence-*  
50  
51 *Based Complementary and Alternative Medicine.* 2020;2020:1-15.  
52  
53  
54  
55  
56 11. Yeh GY, Wood MJ, Lorell BH, *et al.* Effects of tai chi mind-body movement therapy on  
57  
58 functional status and exercise capacity in patients with chronic heart failure: a randomized  
59  
60

- 1  
2  
3  
4 controlled trial. *Am J Med.* 2004;117(8):541-8.  
5  
6  
7 12. Huston P, McFarlane B. Health benefits of tai chi:What is the evidence? *Can Fam*  
8  
9 *Physician.* 2016;62(11):881-90.  
10  
11  
12 13. Hagglund E, Hagerman I, Dencker K, *et al.* Effects of yoga versus hydrotherapy training  
13  
14 on health-related quality of life and exercise capacity in patients with heart failure: A  
15  
16 randomized controlled study. *Eur J Cardiovasc Nurs.* 2017;16(5):381-9.  
17  
18  
19 14. Wisløff U, Støylen A, Loennechen JP, *et al.* Superior cardiovascular effect of aerobic  
20  
21 interval training versus moderate continuous training in heart failure patients: a  
22  
23 randomized study. *Circulation.* 2007;115(24):3086-3094.  
24  
25  
26  
27 15. Ainsworth BE, Haskell WL, Herrmann SD, *et al.* 2011 Compendium of Physical Activities:  
28  
29 a second update of codes and MET values. *Med Sci Sports Exerc.* 2011;43(8):1575-1581.  
30  
31  
32  
33 16. Sun XG. Rehabilitation practice patterns for patients with heart failure: the Asian  
34  
35 perspective. *Heart Fail Clin.* 2015;11(1):95-104.  
36  
37  
38 17. Pandey A, LaMonte M, Klein L, *et al.* Relationship Between Physical Activity, Body Mass  
39  
40 Index, and Risk of Heart Failure. *J Am Coll Cardiol.* 2017;69(9):1129-1142.  
41  
42  
43 18. Shamseer L, Moher D, Clarke M, *et al.* Preferred reporting items for systematic review and  
44  
45 meta-analysis protocols (PRISMA-P) 2015: elaboration and explanation. *BMJ.*  
46  
47 2015;350:g7647.  
48  
49  
50 19. Higgins JPT, Savović J, Page MJ. Chapter 8: Assessing risk of bias in a randomized trial.  
51  
52 In: Higgins JPT, Thomas J, Chandler J, eds.Cochrane Handbook for systematic reviews  
53  
54 ofInterventions. 2nd Edition. Chichester, UK: John Wiley & Sons, 2019: 205–28.  
55  
56  
57  
58 20. Salanti G. Indirect and mixed-treatment comparison, network, or multiple-treatments  
59  
60

- 1  
2  
3  
4 meta-analysis: many names, many benefits, many concerns for the next generation  
5  
6 evidence synthesis tool. *Res Synth Methods*. 2012;3(2):80-97.  
7  
8  
9 21. Higgins JP, Jackson D, Barrett JK, *et al*. Consistency and inconsistency in network meta-  
10  
11 analysis: concepts and models for multi-arm studies. *Res Synth Methods*. 2012;3(2):98-  
12  
13 110.  
14  
15  
16  
17 22. A. C, G. S. Visualizing assumptions and results in network meta-analysis: The network  
18  
19 graphs  
20  
21 package. *Stata J*. 2015;15(4):905-50.  
22  
23  
24  
25 23. Wayne PM, Berkowitz DL, Litrownik DE, *et al*. What do we really know about the safety of  
26  
27 tai chi?: A systematic review of adverse event reports in randomized trials. *Arch Phys Med*  
28  
29 *Rehabil*. 2014;95(12):2470-83.  
30  
31  
32  
33 24. Chan AWK, Chair SY, Lee DTF, *et al*. Tai Chi exercise is more effective than brisk walking  
34  
35 in reducing cardiovascular disease risk factors among adults with hypertension: A  
36  
37 randomised controlled trial. *Int J Nurs Stud*. 2018;88:44-52.  
38  
39  
40  
41 25. Sun J, Buys N. Community-Based Mind-Body Meditative Tai Chi Program and Its Effects  
42  
43 on Improvement of Blood Pressure, Weight, Renal Function, Serum Lipoprotein, and  
44  
45 Quality of Life in Chinese Adults With Hypertension. *Am J Cardiol*. 2015;116(7):1076-81.  
46  
47  
48  
49 26. Zheng G, Li S, Huang M, *et al*. The effect of Tai Chi training on cardiorespiratory fitness in  
50  
51 healthy adults: a systematic review and meta-analysis. *PLoS One*. 2015;10(2):e0117360.  
52  
53  
54  
55 27. Wu W, Liu X, Wang L, *et al*. Effects of Tai Chi on exercise capacity and health-related  
56  
57 quality of life in patients with chronic obstructive pulmonary disease: a systematic review  
58  
59 and meta-analysis. *Int J Chron Obstruct Pulmon Dis*. 2014;9:1253-63.  
60

- 1  
2  
3  
4 28. Liu T, Chan AW, Liu YH, *et al*. Effects of Tai Chi-based cardiac rehabilitation on aerobic  
5  
6 endurance, psychosocial well-being, and cardiovascular risk reduction among patients  
7  
8 with coronary heart disease: A systematic review and meta-analysis. *Eur J Cardiovasc*  
9  
10 *Nurs*. 2018;17(4):368-83.  
11  
12  
13  
14 29. Wang C, Bannuru R, Ramel J, *et al*. Tai Chi on psychological well-being: systematic review  
15  
16 and meta-analysis. *BMC Complement Altern Med*. 2010;10:23.  
17  
18  
19 30. Chen MG, Liang X, Kong L, *et al*. Effect of Baduanjin Sequential Therapy on the Quality  
20  
21 of Life and Cardiac Function in Patients with AMI After PCI: A Randomized Controlled Trial.  
22  
23 *Evid Based Complement Alternat Med*. 2020;2020:8171549.  
24  
25  
26  
27 31. XM. S, GL. J, WH. L, *et al*. The influence of baduanjin on cardiopulmonary function during  
28  
29 cardiac rehabilitation for CHD patients. *Med & Pharm J Chin PLA*. 2017;29(2):24-7.  
30  
31  
32  
33  
34

### Figure legend

35  
36 **Figure 1** Presentation of three traditional Asian exercise (A) Taichi , (B) Baduanjin, and (C)  
37  
38 Yoga. The pictured individual has agreed to publish his image.  
39

40 **Figure 2** Flowchart of the study selection process.  
41  
42  
43  
44  
45  
46  
47  
48  
49  
50  
51  
52  
53  
54  
55  
56  
57  
58  
59  
60

1  
2  
3  
4  
5  
6  
7  
8  
9  
10  
11  
12  
13  
14  
15  
16  
17  
18  
19  
20  
21  
22  
23  
24  
25  
26  
27  
28  
29  
30  
31  
32  
33  
34  
35  
36  
37  
38  
39  
40  
41  
42  
43  
44  
45  
46  
47  
48  
49  
50  
51  
52  
53  
54  
55  
56  
57  
58  
59  
60

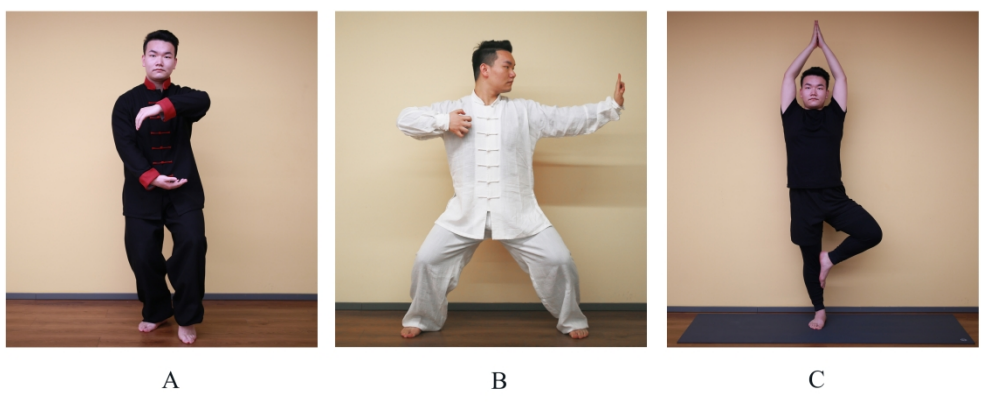

Figure 1 Presentation of three traditional Asian exercise (A) Taichi, (B) Baduanjin, and (C) Yoga. The pictured individual has agreed to publish his image.

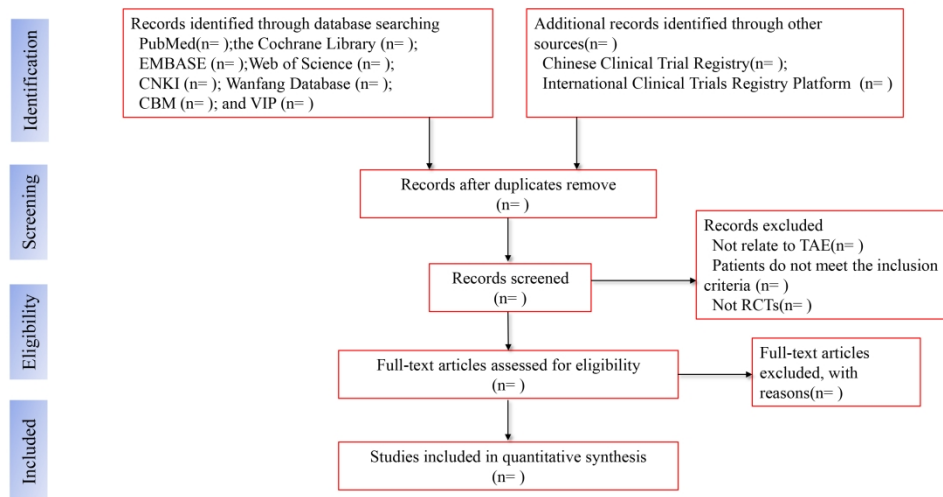

Figure 2 Flowchart of the study selection process.

| <b>Preferred reporting items for systematic review and meta-analysis protocols (PRISMA-P) 2015: elaboration and explanation</b> |                |                                                                                                                                                                                                                 |                                                           |
|---------------------------------------------------------------------------------------------------------------------------------|----------------|-----------------------------------------------------------------------------------------------------------------------------------------------------------------------------------------------------------------|-----------------------------------------------------------|
| <b>Section and topic</b>                                                                                                        | <b>Item No</b> | <b>Checklist item</b>                                                                                                                                                                                           | <b>Page/line numbers</b>                                  |
| <b>Section 1: Administrative information</b>                                                                                    |                |                                                                                                                                                                                                                 |                                                           |
| Title:                                                                                                                          |                |                                                                                                                                                                                                                 |                                                           |
| Identification                                                                                                                  | 1a             | Identify the report as a protocol of a systematic review                                                                                                                                                        | Page 1, Line 1                                            |
| Update                                                                                                                          | 1b             | If the protocol is for an update of a previous systematic review, identify as such                                                                                                                              | None. The protocol is conducting a new systematic review. |
| Registration                                                                                                                    | 2              | If registered, provide the name of the registry (such as PROSPERO) and registration number                                                                                                                      | Page 2, Line 26                                           |
| Authors:                                                                                                                        |                |                                                                                                                                                                                                                 |                                                           |
| Contact information                                                                                                             | 3a             | Provide name, institutional affiliation, and email address of all protocol authors; provide physical mailing address of corresponding author                                                                    | Page 1, Line 8-17                                         |
| Contributions                                                                                                                   | 3b             | Describe contributions of protocol authors and identify the guarantor of the review                                                                                                                             | Page 10, Line 33-37                                       |
| Amendments                                                                                                                      | 4              | If the report represents an amendment of a previously completed or published protocol, identify as such and indicate what changes were made; otherwise state plan for documenting important protocol amendments | None                                                      |
| Support:                                                                                                                        |                |                                                                                                                                                                                                                 |                                                           |
| Sources                                                                                                                         | 5a             | Indicate sources of financial or other support for the review                                                                                                                                                   | Page 11, Line 5-6                                         |
| Sponsor                                                                                                                         | 5b             | Provide name of the review funder and/or sponsor                                                                                                                                                                | Page 11, Line 5-6                                         |
| Role of sponsor and/or funder                                                                                                   | 5c             | Describe roles of funder(s), sponsor(s), and/or institution(s), if any, in developing the protocol                                                                                                              | None                                                      |

|                                |     |                                                                                                                                                                                                                               |          |
|--------------------------------|-----|-------------------------------------------------------------------------------------------------------------------------------------------------------------------------------------------------------------------------------|----------|
| <b>Section 2: Introduction</b> |     |                                                                                                                                                                                                                               |          |
| Rationale                      | 6   | Describe the rationale for the review in the context of what is already known                                                                                                                                                 | Page 3-4 |
| Objectives                     | 7   | Provide an explicit statement of the question(s) the review will address with reference to participants, interventions, comparators, and outcomes (PICO)                                                                      | Page 4   |
| <b>Section 3: Methods</b>      |     |                                                                                                                                                                                                                               |          |
| Eligibility criteria           | 8   | Specify the study characteristics (such as PICO, study design, setting, time frame) and report characteristics (such as years considered, language, publication status) to be used as criteria for eligibility for the review | Page 4-5 |
| Information sources            | 9   | Describe all intended information sources (such as electronic databases, contact with study authors, trial registers or other grey literature sources) with planned dates of coverage                                         | Page 5-6 |
| Search strategy                | 10  | Present draft of search strategy to be used for at least one electronic database, including planned limits, such that it could be repeated                                                                                    | Page 5-6 |
| <b>Study records</b>           |     |                                                                                                                                                                                                                               |          |
| Data management                | 11a | Describe the mechanism(s) that will be used to manage records and data throughout the review                                                                                                                                  | Page 8   |
| Selection process              | 11b | State the process that will be used for selecting studies (such as two independent reviewers) through each phase of the review (screening, eligibility, and inclusion in meta-analysis)                                       | Page 7   |
| Data collection process        | 11c | Describe planned method of extracting data from reports (such as piloting forms, done independently, in duplicate), any processes for obtaining and                                                                           | Page 7   |



|                                 |     |                                                                                                                                                                                                                                      |              |
|---------------------------------|-----|--------------------------------------------------------------------------------------------------------------------------------------------------------------------------------------------------------------------------------------|--------------|
|                                 |     | confirming data from investigators                                                                                                                                                                                                   |              |
| Data items                      | 12  | List and define all variables for which data will be sought (such as PICO items, funding sources) and any pre-planned data assumptions and simplifications                                                                           | Page 7       |
| Outcomes and prioritisation     | 13  | List and define all outcomes for which data will be sought, including prioritisation of main and additional outcomes, with rationale                                                                                                 | Page 5 and 7 |
| Risk of bias individual studies | 14  | Describe anticipated methods for assessing risk of bias of individual studies, including whether this will be done at the outcome or study level, or both; state how this information will be used in data synthesis                 | Page 8       |
| Data synthesis                  | 15a | Describe criteria under which study data will be quantitatively synthesised                                                                                                                                                          | Page 8       |
|                                 | 15b | If data are appropriate for synthesis, describe planned summary measures, methods of handling data, and methods of combining data from studies, including any planned exploration of consistency (such as $I^2$ , Kendall's $\tau$ ) | Page 8       |
|                                 | 15c | Describe any proposed additional analyses (e.g., sensitivity or subgroup analyses, meta-regression)                                                                                                                                  | Page 9       |

|                                   |     |                                                                                                                               |        |
|-----------------------------------|-----|-------------------------------------------------------------------------------------------------------------------------------|--------|
|                                   | 15d | If quantitative synthesis is not appropriate, describe the type of summary planned                                            | Page 9 |
| Meta-bias(es)                     | 16  | Specify any planned assessment of meta-bias(es) (such as publication bias across studies, selective reporting within studies) | Page 9 |
| Confidence in cumulative estimate | 17  | Describe how the strength of the body of evidence will be assessed (such as GRADE)                                            | Page 9 |

## Search strategy

## Pubmed database

(((((((((((((((((tai chi[All Fields])) OR (taiji)) OR (taiqi)) OR (tai ji quan)) OR (tai chi chuan)) OR (taichi qigong)) OR (shadowboxing)) OR (baduanjin)) OR (Baduanjin exercise)) OR (eight section brocades)) OR (yoga)) OR (yogic)) OR (asana)) OR (pranayama)) OR (dhyana)[All Fields])) AND ((((((((((((((((((chronic heart failure[All Fields])) OR (heart failure with reduced ejection fraction)) OR (heart failure with mid-range ejection fraction)) OR (heart failure with preserved ejection fraction)) OR (cardiac failure)) OR (heart failure)) OR (heart decompensation)) OR (right-sided heart failure)) OR (myocardial failure)) OR (congestive heart failure)) OR (left sided heart failure)) OR (ventricular failure))
