# Supplementary material for: Effect of traditional Asian exercise on patients with chronic heart failure: a protocol for network meta-analysis of randomised controlled trials
Source: PubMed Central journal article supplement — BMJ Open. 2021 Aug 27;11(8):e048891. doi: 10.1136/bmjopen-2021-048891 (PMC8404441; doi:10.1136/bmjopen-2021-048891), 2021-08-27
Supplement: bmjopen-2021-048891supp001.pdf [file bmjopen-2021-048891supp001.pdf]

| <b>Preferred reporting items for systematic review and meta-analysis protocols (PRISMA-P) 2015: elaboration and explanation</b> |                |                                                                                                                                                                                                                 |                                                           |
|---------------------------------------------------------------------------------------------------------------------------------|----------------|-----------------------------------------------------------------------------------------------------------------------------------------------------------------------------------------------------------------|-----------------------------------------------------------|
| <b>Section and topic</b>                                                                                                        | <b>Item No</b> | <b>Checklist item</b>                                                                                                                                                                                           | <b>Page/line numbers</b>                                  |
| <b>Section 1: Administrative information</b>                                                                                    |                |                                                                                                                                                                                                                 |                                                           |
| Title:                                                                                                                          |                |                                                                                                                                                                                                                 |                                                           |
| Identification                                                                                                                  | 1a             | Identify the report as a protocol of a systematic review                                                                                                                                                        | Page 1, Line 1                                            |
| Update                                                                                                                          | 1b             | If the protocol is for an update of a previous systematic review, identify as such                                                                                                                              | None. The protocol is conducting a new systematic review. |
| Registration                                                                                                                    | 2              | If registered, provide the name of the registry (such as PROSPERO) and registration number                                                                                                                      | Page 2, Line 26                                           |
| Authors:                                                                                                                        |                |                                                                                                                                                                                                                 |                                                           |
| Contact information                                                                                                             | 3a             | Provide name, institutional affiliation, and email address of all protocol authors; provide physical mailing address of corresponding author                                                                    | Page 1, Line 8-17                                         |
| Contributions                                                                                                                   | 3b             | Describe contributions of protocol authors and identify the guarantor of the review                                                                                                                             | Page 10, Line 33-37                                       |
| Amendments                                                                                                                      | 4              | If the report represents an amendment of a previously completed or published protocol, identify as such and indicate what changes were made; otherwise state plan for documenting important protocol amendments | None                                                      |
| Support:                                                                                                                        |                |                                                                                                                                                                                                                 |                                                           |
| Sources                                                                                                                         | 5a             | Indicate sources of financial or other support for the review                                                                                                                                                   | Page 11, Line 5-6                                         |
| Sponsor                                                                                                                         | 5b             | Provide name of the review funder and/or sponsor                                                                                                                                                                | Page 11, Line 5-6                                         |
| Role of sponsor and/or funder                                                                                                   | 5c             | Describe roles of funder(s), sponsor(s), and/or institution(s), if any, in developing the protocol                                                                                                              | None                                                      |

| <b>Section 2: Introduction</b> |     |                                                                                                                                                                                                                               |          |
|--------------------------------|-----|-------------------------------------------------------------------------------------------------------------------------------------------------------------------------------------------------------------------------------|----------|
| Rationale                      | 6   | Describe the rationale for the review in the context of what is already known                                                                                                                                                 | Page 3-4 |
| Objectives                     | 7   | Provide an explicit statement of the question(s) the review will address with reference to participants, interventions, comparators, and outcomes (PICO)                                                                      | Page 4   |
| <b>Section 3: Methods</b>      |     |                                                                                                                                                                                                                               |          |
| Eligibility criteria           | 8   | Specify the study characteristics (such as PICO, study design, setting, time frame) and report characteristics (such as years considered, language, publication status) to be used as criteria for eligibility for the review | Page 4-5 |
| Information sources            | 9   | Describe all intended information sources (such as electronic databases, contact with study authors, trial registers or other grey literature sources) with planned dates of coverage                                         | Page 5-6 |
| Search strategy                | 10  | Present draft of search strategy to be used for at least one electronic database, including planned limits, such that it could be repeated                                                                                    | Page 5-6 |
| <b>Study records</b>           |     |                                                                                                                                                                                                                               |          |
| Data management                | 11a | Describe the mechanism(s) that will be used to manage records and data throughout the review                                                                                                                                  | Page 8   |
| Selection process              | 11b | State the process that will be used for selecting studies (such as two independent reviewers) through each phase of the review (screening, eligibility, and inclusion in meta-analysis)                                       | Page 7   |
| Data collection process        | 11c | Describe planned method of extracting data from reports (such as piloting forms, done independently, in duplicate), any processes for obtaining and                                                                           | Page 7   |

|                                 |     |                                                                                                                                                                                                                                      |              |
|---------------------------------|-----|--------------------------------------------------------------------------------------------------------------------------------------------------------------------------------------------------------------------------------------|--------------|
|                                 |     | confirming data from investigators                                                                                                                                                                                                   |              |
| Data items                      | 12  | List and define all variables for which data will be sought (such as PICO items, funding sources) and any pre-planned data assumptions and simplifications                                                                           | Page 7       |
| Outcomes and prioritisation     | 13  | List and define all outcomes for which data will be sought, including prioritisation of main and additional outcomes, with rationale                                                                                                 | Page 5 and 7 |
| Risk of bias individual studies | 14  | Describe anticipated methods for assessing risk of bias of individual studies, including whether this will be done at the outcome or study level, or both; state how this information will be used in data synthesis                 | Page 8       |
| Data synthesis                  | 15a | Describe criteria under which study data will be quantitatively synthesised                                                                                                                                                          | Page 8       |
|                                 | 15b | If data are appropriate for synthesis, describe planned summary measures, methods of handling data, and methods of combining data from studies, including any planned exploration of consistency (such as $I^2$ , Kendall's $\tau$ ) | Page 8       |
|                                 | 15c | Describe any proposed additional analyses (e.g., sensitivity or subgroup analyses, meta-regression)                                                                                                                                  | Page 9       |

|                                   |     |                                                                                                                               |        |
|-----------------------------------|-----|-------------------------------------------------------------------------------------------------------------------------------|--------|
|                                   | 15d | If quantitative synthesis is not appropriate, describe the type of summary planned                                            | Page 9 |
| Meta-bias(es)                     | 16  | Specify any planned assessment of meta-bias(es) (such as publication bias across studies, selective reporting within studies) | Page 9 |
| Confidence in cumulative estimate | 17  | Describe how the strength of the body of evidence will be assessed (such as GRADE)                                            | Page 9 |
