# Supplementary material for: Effect of traditional Asian exercise on patients with chronic heart failure: a protocol for network meta-analysis of randomised controlled trials
Source: PubMed Central journal article supplement — BMJ Open. 2021 Aug 27;11(8):e048891. doi: 10.1136/bmjopen-2021-048891 (PMC8404441; doi:10.1136/bmjopen-2021-048891), 2021-08-27
Supplement: bmjopen-2021-048891supp002.pdf [file bmjopen-2021-048891supp002.pdf]

### Search strategy

#### Pubmed database

(((((((((((((((((tai chi[All Fields])) OR (taiji)) OR (taiqi)) OR (tai ji quan)) OR (tai chi chuan)) OR (taichi qigong)) OR (shadowboxing)) OR (baduanjin)) OR (Baduanjin exercise)) OR (eight section brocades)) OR (yoga)) OR (yogic)) OR (asana)) OR (pranayama)) OR (dhyana)[All Fields])) AND ((((((((((((((((((chronic heart failure[All Fields])) OR (heart failure with reduced ejection fraction)) OR (heart failure with mid-range ejection fraction)) OR (heart failure with preserved ejection fraction)) OR (cardiac failure)) OR (heart failure)) OR (heart decompensation)) OR (right-sided heart failure)) OR (myocardial failure)) OR (congestive heart failure)) OR (left sided heart failure)) OR (ventricular failure))
